# Supplementary material for: Modeled Greenland Ice Sheet evolution constrained by ice-core-derived Holocene elevation histories
Source: Copernicus journal article supplement (doi:10.5194/egusphere-2024-2223), 2024-07-24
Supplement: Supplementary file [file egusphere-2024-2223-AC2-supplement.pdf]

Responses to Reviewers' Comments for Manuscript EGUSPHERE-2024-2223

# **Modeled Greenland Ice Sheet evolution constrained by ice-core-derived Holocene elevation histories**

Addressed Comments for Publication to

The Cryosphere

by

Mikkel L. Lauritzen, Anne Solgaard, Nicholas Rathmann, Bo M. Vinther, Aslak  
Grindsted, Brice Noël, Guðfinna Aðalgeirsdóttir, Christine S. Hvidberg

## Authors' Response to Referee 1

**General Comments.** This work investigates the evolution of both the Greenland Ice Sheet (GrIS) and the Canadian Arctic Archipelago during the last deglaciation using simulations of the PISM ice-sheet model. It explores how Holocene surface elevation histories, derived from ice-core data across the ice sheet, can be used to validate model results and refine model parameters. A well-known issue in the field is the difficulty of 3D ice sheet models in accurately simulating Holocene thinning curves across Greenland: this work successfully replicates these curves and attributes the previous data-model discrepancies to the limited modeled ice-sheet advance and the lack of a connection between the Innuitian ice sheet (IIS) and the GrIS during the Last Glacial Maximum (LGM).

Given the scarcity of information on the GrIS evolution away from the margin, surface elevation histories can be an additional useful metric for model validation helping to constrain the evolution of the ice-sheet interior and the overall volume. By considering a domain that includes the IIS and by adjusting the bedrock elevation at the LGM, the authors can replicate the Holocene thinning curves with good agreement upon having calibrated 20 key model parameters.

I find this a very interesting work. It shows how the Holocene ice-core derived surface elevation changes can be used to validate the modeled ice-sheet evolution, as long as the response of the GrIS to non-local changes in the ice load and/or ice dynamics are considered. However, given the high uncertainty in deriving such thinning curves from ice cores and the availability of both more reliable paleodata sources, such as exposure dates of moraines, and present day observations, I think one must be careful in using these elevation histories as - almost - the only metric for validating model simulations. I strongly agree with Jessica Badgley, who commented in the discussion. While I won't reiterate her points, I believe she raised several important considerations. Additionally, there is a significant discrepancy between the modeled retreat history and that reconstructed from proxy data, particularly regarding the timing of the retreat. This issue needs to be addressed before considering the elevation history of Greenland, as the magnitude and timing of bedrock uplift and ice thickness changes are influenced by the timing of ice margin retreat.

**Response:** Thank you for your feedback and interest in our work.

We have carefully addressed all the issues item by item as follows.

## Comment 1

Wrong timing and spatial variability of ice-sheet retreat: The GrIS evolution simulated throughout the deglaciation does not match the timing of the ice margin retreat inferred from several proxies (most of all moraines) and geomorphological reconstructions. Leger et al. 2023 did an amazing work in collecting and processing most of data available across Greenland to provide a detailed information on area change and timing of the deglaciation across the ice sheet. Most of the GrIS deglaciated already before 9 kyr ago (see Figure 15 of Leger et al., 2023) while your figure 6b still shows a glacial-expanded Greenland. This suggests that simulations presented here are systematically late in modeling the ice-sheet shrinkage during the last deglaciation and I am wondering how this might affect the simulated ice-core thinning curves. I think this is a key aspect that has to be solved before investigating the thinning curves in detail, otherwise you might find a good elevation history match but for the wrong reasons. Surface elevation changes occur because of changes in bedrock elevation, but also because of changes in ice thickness, which are in turn related to changes in the mass balance and ice dynamics. Ice dynamics and local changes in bedrock elevation are associated with the retreat history of Greenland, the former mostly due to dynamic reorganization occurring during the deglaciation, and the latter to changes in the ice load. I do believe that simulating a correct bedrock elevation change during the last deglaciation is key to correctly replicate the Holocene surface elevation change. However we should first be able to simulate the right retreat history of Greenland before trying to replicate the Holocene surface elevation curves from ice cores with a model.

**Response:** Thank you for the comment.

The simulations presented here are indeed systematically late in modeling the ice sheet retreat during the last deglaciation and the ice bridge between the IIS and the GrIS collapses about 3 ka later than the findings by England et al. (2006) as pointed out in line 272-274.

We agree that modeling the timing of the retreat would improve the overall confidence of the simulations, provided that the ice dynamics and basal hydrology and sliding are realistically represented in the model. In reality, however, the ice flow models have limitations, and constraining the evolution to just the retreat also risks getting the retreat right for the wrong reasons. Of course the marginal retreat depends largely on the ocean forcing but also, as you mention, on the ice dynamics and the bedrock elevation histories. Our approach in this paper is to focus on one aspect, the ice core derived surface elevation history, as a new and independent

first step, as it provides important new insights to the limitations of the ice flow model. Clearly the next step, for a further study, would be to use also retreat rates as constraints. As discussed in lines 274-277 the ensemble members with earlier onsets of oceanic forcing becomes too thin at Camp Century in the middle of the Holocene. This suggests that further work is needed to understand this apparent inconsistency between the proxies.

In the revised version of the paper we will provide a more detailed comparison of the mismatch in the modeled retreat to the moraine-line-derived retreat of Leger et al. (2024) to highlight the model limitations and discuss how the margin retreat can be used in the next step in the model development.

In the revised paper we will provide a new figure that highlights the mismatch in elevation at CC during mid-Holocene for the ensemble members with earlier onsets of oceanic forcing, and we will discuss what the model limitations are.

#### Comment 2

Importance of bedrock adjustment: I find the procedure for adjusting the bedrock quite interesting but I think I don't fully understand the motivation/significance of it. What does this strategy mean conceptually: why do you need to refine the bedrock at the LGM, if the model simulates the glaciostatic adjustment? Is this a necessary step to well replicate the modeled surface elevation history throughout the Holocene or is it a strategy to reduce the elevation mismatch only at the present? Have you run an ensemble of simulations without such an adjustment to evaluate its effect on the ice-sheet shrinkage during the last deglaciation? I think that a more detailed justification of this procedure and a discussion about the implications of such a procedure on your results is needed.

**Response:** Thank you for the comment.

We only know the bedrock at present day, not in the past. The model simulates the glaciostatic adjustment over time from an unknown state at LGM, and when the model does not match the present day bedrock at the end of the run, we need to refine the initial bedrock at -20 ka, and re-run the model. When running model without adjusting the initial bedrock at -20 ka, the glaciostatic adjustment does not return the bedrock to the observed state at present as shown in Fig. 3b. Changing the bedrock does impact the elevation history, but we would not consider

it essential for modeling the ice-core-derived elevation histories. However, using an incorrect bedrock configuration could produce the correct elevation histories for the wrong reasons.

In the revised paper we will clarify the procedure in lines 155-165 and provide a figure showing the effect of bedrock adjustment in the model simulations on the surface elevation histories as well.

### Comment 3

Outdated paleo climatology: using a spatially homogeneous temperature and precipitation signal to force the model during the last deglaciation is an outdated procedure. There are several products available with high temporal resolution (e.g. Badgley et al, 2020, Buizert et al., 2018), based on the trace21k experiment (Liu et al., 2009, He et al., 2013) and improved with ice-core derived information that can do the job better. These paleoclimate reanalysis have enhanced our knowledge on the Holocene climate in Greenland and make the anomaly method for this period completely outdated. These products have already been used in several works tackling the GrIS evolution during the last deglaciation (Briner et al., 2020, Cuzzone et al., 2022, very recently in Tabone et al, 2024) and they clearly show that considering a spatially homogeneous temperature across Greenland is incorrect. I believe that using such data would also help to reproduce the spatially variable retreat suggested for the last deglaciation (Leger et al., 2023).

**Response:** Thank you for the comment.

We agree that using a spatially homogeneous temperature is an old procedure. However, this choice was firstly to align with the assumption of Vinther et al. (2009) that local temperature offsets were due to a Greenland wide temperature anomaly and local elevation feedback. Secondly, we chose the five different and frequently used temperature reconstructions and sampled over a range of atmospheric lapse rates to cover the historic temperature uncertainty. This eased the interpretation of the Bayesian inference and enabled us to tell if there was any regional discrepancies as pointed out in lines 215-220.

The TraCE-21K climate simulations use the ice sheet configuration of ICE-5G which is not consistent with our simulated ice sheet and does not include an ice shelf covering the Baffin Bay. Placing too high confidence in these products could introduce a different bias and when making

a reconstruction of the Holocene evolution we prefer to keep it independent of any previous reconstructions to avoid any circular conclusions.

The precipitation field is not spatially uniform as detailed in lines 118-121 and eq. 1. We introduce a meridional gradient in the accumulation scaling exactly because we want to allow for different accumulation histories in the north and the south.

In the revised paper we will include a discussion of the use of non-uniform temperature anomalies and reanalysis products, and add a reference to the suggested paper.

#### Comment 4

Discussion missing on drivers of Holocene thinning: I am missing a clear discussion on what is driving the Greenland elevation change following your simulations. You claim that by including the IIS and an ice shelf in Baffin Bay you can reproduce the Holocene elevation history in Greenland, but which is the glaciological explanation for it? Is it the bedrock response to non-local changes in the ice load, or is it the dynamic effect induced by the loss in buttressing upon ice shelf retreat in Baffin Bay, or both of them or what is responsible for the Holocene elevation drop in Greenland? If the loss of buttressing is the preponderant mechanism, why do we see a drop in elevation already several thousand of years prior to the ice shelf collapse? Please, provide a clearer explanation of your findings as this is key to improve our knowledge in the field.

**Response:** Thank you for the comment.

It is the changes in climate conditions that are driving the change in mass balance which in turn changes the dynamics of the ice sheet and forces it to thin. The bedrock adjusts to the load and generally acts as a negative feedback to the changes. The ice sheet starts to thin at the margin as a response to the temperature rise at the early Holocene which leads to thinning in the interior w/ and w/o bedrock adjustment. This also leads to the collapse of the ice shelf in Baffin Bay which further reduces the buttressing. After the onset of the ocean forcing, the mass loss speeds up again as seen in Fig. 8 and the ice bridge at Nares Strait collapses. We need the ice sheet to advance beyond the present-day boundaries in order for the ice sheet to be thick enough at the four ice core sites at the LGM as shown by the two simulations restricted to the present-day land margin and the ECS. While it might be possible to get an ice sheet profile that matches both the present-day extent and the LGM thickness at the four ice core sites by

changing the viscosity spatially, this would be modeling the right elevation for the wrong reason, as we know the ice sheet extended beyond the present-day extent.

In the revised version of the paper we will add a clear discussion of the drivers of Holocene thinning and a motivation for the necessity of including the extended ice sheet.

#### Comment 5

Usage of other present-day observables: I understand that the estimation of model uncertainty/model parameter calibration has been done by applying a Bayesian approach only to the ice-core surface elevation histories, whilst the others “observables” of Table 2 (present day thickness, surface velocity) are estimated from the resulting probability density functions. Why not including such “observables” already in the bayesian inference to validate your model simulations? This would allow to not rely only on surface elevation change (which is much more uncertain than satellite inferred observables) to evaluate model results.

**Response:** Thank you for the comment.

The reason for excluding present-day observables from our Bayesian inference is that we are primarily interested in testing the feasibility of using the past surface elevation history to understand how prognostic (future) simulations might be biased by the long-term response of the GrIS to past climatic changes. To judge this, we argue that using this data in isolation makes our results most clear. We can see that this important goal of assessing the long-term response of the GrIS is not highlighted sufficiently in the paper.

Present-day observables are included only as a source of independent data for model validation. Our goal is not to replicate the present-day state within the bounds of observational uncertainty, which is, to the best of our understanding, a more generally unresolved problem.

In the revised version of the paper we will make sure to state why we only use the ice-core-derived surface elevation histories in our Bayesian inference. Further, we will clarify in the introduction that our goal is to assess the long-term response of the GrIS to past climatic changes.

### Comment 6

Unclear glacial spin up: Is the model run with a fixed LGM climatology for 80 kyrs or is it run forced with a temporal variable temperature and precipitation signal? If it is the latter, which is the glacial climatology used? Moreover, how are the parameters set up during the spin up? If I understand correctly, only one spin up is done for all the simulations in the ensemble, then the response of the model to the 20 key parameters is explored only since the LGM. If this is so, this might lead to a certain “shock” of the model in the first years after the initialization (after the LGM). Actually, I think I see this shock in Figure 7b, where the volume suddenly drops after the LGM for the “constrained to present geometry” case. I don’t think this procedure undermines your results, since your work focuses on the Holocene (which starts after 8000 years from this “new” initialization), but it would be good either to do one spin up for each ensemble member to avoid this inconsistency or at least describe the first years of your ensemble simulations as part of the spinup.

**Response:** Thank you for the comment.

The glacial spin-up is indeed done using the temperature anomaly record based on the NGRIP ice core (reconstruction number 3) and by using a single set of parameters. We will make sure to state these.

Yes, there is indeed only one spinup which is then branched at -20 ka to ensure that the ensemble members have enough time to recover from the shock of changing the bed topography and the parameters.

In the revised version of the paper it will be clearly stated what parameters and temperature forcings are used for the spin-up in the "Earth deformation and initialization" section. We will describe the branching of the ensemble members between -20 ka and the onset of the Holocene at -11.7 ka.

Specific comments:

#### Comment 7

Please check the citation format throughout the text: The sentence “as demonstrated by (Adalgeirsdóttir et al., 2014)” should be “as demonstrated by Adalgeirsdóttir et al. (2014)”, for instance.

**Response:** Thank you for the comment.

This is indeed a blunder. We have changed the citation format and made sure that the rest are correct.

In the revised version of the paper the citation format will be consistent.

#### Comment 8

Lines 6-8: How can we have “confidence in the modeled GrIS historical evolution” if the model does not reproduce the retreat history correctly?

**Response:** Thank you for the comment.

That is a good question. We will have greater confidence in the simulations that are constrained to the Holocene surface elevation histories than simulations that are not. That being said, reproducing the retreat history would further enhance our confidence of the simulations and the long term response. As written in the reply to comment 1, we believe that reproducing the internal thinning is an important first step to increase our confidence.

In the revised version of paper a comparison of mismatch will be shown in a new figure as suggested in response to comment 1.

#### Comment 9

Lines 38-41: this is not entirely true. What about the constraints on past ice-sheet extent given by e.g. moraines, marine sediment cores, coastal organic material? This is a reliable information we do have on past GrIS retreat.

**Response:** Thank you for the comment.

By no direct measurements we mean that there are no satellite observations.

In the revised paper the sentence in line 38-41 will be rephrased to include other types of data as stated above.

#### Comment 10

Lines 44-45: I think here a more detailed description about previous work is needed. It is true that previous work did not consider the effect of the IIS on the deglaciation but it was still successful in reducing the data-model misfit at specific ice-core sites. Lecavalier et al., 2017 was actually successful in reproducing the magnitude of the Camp Century elevation change by correcting the Holocene climate forcing in North Greenland, as reconstructed from the Agassiz record, to force an ice-sheet model coupled to a GIA model of relative sea level change. Another very recent work (Tabone et al., 2024) was able to reduce the mismatch at the NGRIP site by considering the effect of the paleo NEGIS dynamics on the ice-sheet interior using a 3D ice-sheet model.

**Response:** Thank you for the comment.

Yes, Lecavalier et al. (2017) were able to reproduce the thinning at CC without including the effect of IIS. We mention this in lines 362-367, but will move it to lines 44-45.

In the revised paper the description in lines 44-45 will be expanded to include more detailed description on the previous work to model GrIS Holocene elevation changes including the work of Lecavalier et al. (2017) and Tabone et al. (2024).

### Comment 11

Lines 60-70, 114-116: as written in the general comments, using a homogeneous temperature reconstruction from ice cores to force the model is unnecessary here, as there are already several deglaciation climate products (Badgeley et al., 2020, Buizert et al., 2018) which do consider the spatial climatic variability that the GrIS experienced during the last deglaciation. I think using this reanalysis instead of a uniform climatology would allow to better replicate the asynchronous ice-sheet retreat during the last deglaciation (see below and Leger et al., 2023).

**Response:** Thank you for the comment.

As written in the previous response, we choose to use the spatially uniform temperature reconstructions to make use of Vinther et al. (2009) data in most logical way. As a next step it might be a good idea to use non-uniform temperature reconstruction although we believe that keeping the Holocene reconstruction of the Greenland Ice Sheet independent of any previous reconstruction would be best to avoid circular conclusions.

In the revised paper a discussion will be included as stated in response to comment 3.

### Comment 12

Lines 130-131 and Table 1: ocean melt onset parameter “tau”: why is this explored between -4 and -8 ka, whilst Clark et al., 2020 show an increase in the oceanic forcing already at the early Holocene (at 45°N, 30°W, figure 1k)? Below in the manuscript it is found that the sub-shelf ocean melt that best matches the Camp Century thinning curve starts around -5 ka. Is there any evidence of this, e.g. from sediment cores in Nares Strait?

**Response:** Thank you for the comment.

The ocean onset parameter, tau, is explored between -4 and -8 ka as this is the interval showing the highest ice-core-derived elevation likelihood after doing a few exploratory simulations. There is no evidence of ocean melt increase from sediment cores at this time to our knowledge. The time is only what is inferred from the Bayesian calibration when constrained to the ice-core-derived elevation changes.

In the revised version of the paper it will be clarified in lines 172-173 how this interval is selected.

### Comment 13

Lines 155-156: could you show a 2D map of the bedrock at -20 ka after it has been adjusted? Also, from Figure 2 it seems that the adjusted LGM bedrock elevation is higher than that of the present day, on average, but I believe that it is lower than the one simulated at the LGM before the iteration. . .

**Response:** Thank you for the comment.

This is a good suggestion that we would like to act on by create a new figure to be included in the appendix. Figure 2 is a schematic figure that shows the different steps of the experiment and does not show the elevation. While the x-axis depicts time the y-axis is only used to reflect the fact that the states differ.

In the revised version of the paper we will include a figure to show the bedrock topography at -20 ka.

We will clarify the caption of Fig. 2.

### Comment 14

Line 162: “unwanted deglaciation”: is this because by lowering the bedrock elevation at the margin (I guess without updating the ice thickness), the surface elevation decreases too, therefore the ice sheet surface becomes exposed to higher air temperatures?

**Response:** Thank you for the comment.

The idea behind the relaxation parameter was that there might be some positive feedback that would add to the imposed changes in the bedrock adjustment. However, it is not clear if this feedback exists as the bedrock-surface-mass balance feedback is negative and therefore the relaxation parameter might be redundant although we do not explore this.

In the revised version of the paper a sentence will be added stating why we introduced the relaxation parameter and why it might be redundant.

#### Comment 15

Figure 3: why not showing the 2D bedrock elevation at the last iteration too, for comparison?

**Response:** Thank you for the comment.

This is a good idea that would make the comparison easier for readers, the last iteration 2D bedrock elevation will replace the third one that is now in Figure 3.

Figure 3 will be revised to show the bedrock elevation at the last iteration rather than the 3rd.

#### Comment 16

Line 169: “while the oceanic and atmospheric parameters chosen reflect the change in our model setup”: unclear, please rephrase.

**Response:** Thank you for the comment.

We agree that the sentence is unclear and will rephrase it in the revised version of the paper. We meant to say that the dynamic parameters are the same as those varied by Aschwanden and Brinkerhoff (2022), while the oceanic and atmospheric parameters are the ones that are introduced in the simulations presented in this paper.

In the revised version of the paper sentence in line 169 will be rephrased.

### Comment 17

Line 202: “two simulations were restricted from advancing beyond the present-day GrIS coast...”. To my understanding one simulation did not advance from the present-day GrIS coast, and the other from the Greenlandic continental shelf, isn't that it? Please rephrase.

**Response:** Thank you for the comment.

Yes, that is indeed correct. We will rephrase this.

In the revised version of the paper sentence in line 202 will be rephrased.

### Comment 18

Lines 202-206: As far as I understand, you initialize the model at the LGM prior to start the simulation ensemble, so how can it be that you simulate different GrIS extents at the end of the glacial period depending on the parameters set? I would expect that all your simulations show a well advanced LGM, since this configuration is generated by the same initialization, and then in the ensemble you explore different deglaciation patterns. What am I missing?

**Response:** Thank you for the comment.

Yes, all simulations start from the same state at -20 ka. One simulation is then forced to retreat to the ECS mask and one to the present-day land mask by removing all ice outside their respective masks.

In the revised paper the sentence in lines 202-206 will be revised to make it clear that the two simulations are only restricted after the spin-up.

### Comment 19

Lines 230-231: what about the configuration at the LGM? Why do you simulate a maximum glacial extent only at -12 ka? Can this be a drift of the model as it might still be adapting to the new parameters set after the initialization at the LGM?

**Response:** Thank you for the comment.

This is a good point, there might be a drift in the model due to adaptation to the new parameter selection and bedrock adjustment. It is confusing to use the model state at -12 ka to resemble the LGM, this will not be done in the revised version of the paper.

In the revised version of the paper we will describe that model shock to the new parameters between -20 ka and -11.7 ka.

#### Comment 20

Lines 243-244: "The GrIS rate of change becomes negative at -10.7 ka and peaks at -7.8 ka with a mass loss rate of 548 Gt a<sup>-1</sup>", is it? Or does it peak around -5 ka? I don't see such a mass loss rate either.

**Response:** Thank you for the comment.

This sentence is admittedly a bit unclear. There are two peaks of mass loss rate, one at -7.8 ka and one at -4.95 ka with mass loss rates of 548 and 511 Gt a<sup>-1</sup> respectively.

In the revised version of paper the sentence on lines 243-244 will be rephrased to make it more clear. We will change "4.95 ka" to "-4.95 ka" and make sure that this is consistent.

#### Comment 21

Figure 6: please change the color scales so that the bathymetry can't be confused with the surface velocity. Also, the "bridge" between the LIS and the GrIS is floating ice, right? Please show clearly where are the ice shelves in these maps.

**Response:** Thank you for the comment.

We agree that the color maps may result in a risk of confusion in interpreting the figure. No, the bridge between the IIS and the GrIS is grounded while the ice over Baffin Bay is floating forming an ice shelf.

The revised version of Figure 6 will include outlines between the grounded, floating and ice free regions and make sure to use color maps that cannot be confused.

#### Comment 22

Figure 11c: it would be interesting to see your simulated bedrock uplift and the ice thinning for the four ice-core sites as in Figure S2 of Lecavalier et al., 2017 or Figure S15 of Tabone et al., 2024. Let's consider Camp Century for instance. From Figure 11c you simulate an Holocene uplift of ~400-500 m, so to replicate the elevation drop of ~600 m you model in Figure 4, you'd need a decrease in ice thickness more or less of the same magnitude. Is this what you simulate?

**Response:** Thank you for the comment.

Yes, indeed the simulations produce Holocene uplift at CC of  $367 \pm 14$  m and the ice thickness decreases by almost 1000 m.

In the revised version of the paper a new figure will be added in the appendix showing the bedrock uplift, the ice thickness and the elevation for the four sites.

#### Comment 23

Line 269: please correct "Smith Ice Stream" to "Smith Sound Ice Stream".

**Response:** Thank you for the comment.

Yes, that is the correct name. We will change it.

In the revised version the name will be Smith Sound Ice Stream.

#### Comment 24

Lines 272-274: how are your isochrones compared with isochrones from Leger et al., 2023? Also, “The modeled collapse of the ice bridge in Nares Strait occurs at  $4.9\pm 0.5$  ka before present,..”: this is in contrast with several evidence/modeling work (e.g. Figure 15 from Leger et al, 2023, but also Lecavalier et al., 2017, England et al., 2006, )...I think this is a central point that has to be solved before we can use elevation change histories to constrain models. The timing in the bedrock uplift should reflect the timing in the deglaciation, so how can we trust the Holocene thinning curves if the modeled margin retreat lags several thousand of years the observations?

**Response:** Thank you for the comment.

That is a good question. As mentioned the timing of the retreat is late compared to England et al. (2006) and Leger et al. (2024)

In the revised version of the paper we will include a figure that shows the modeled isochrones compared to Leger et al. (2024) and put it in the appendix.

#### Comment 25

Figure 9c: please choose a discrete color palette to better show the isochrones of the last deglaciation (one color every 2kyr for example).

**Response:** Thank you for the comment.

In the revised version of the paper we will change the color palette to only have one color every 2kyr.

#### Comment 26

Lines 278-280: where do we see this rate of change? Also, do you mean 5000 years (and not 500 years)? At least from your video (<https://av.tib.eu/media/68337>) I can see by eye that the rate of change seems to follow the timing of the ocean melt scaling, which in your best simulation starts 5000 years ago.

**Response:** Thank you for the comment.

The rate of change can be seen in Fig. 8 for the ensemble member with the highest likelihood. The ensemble estimates of this rate of change can be seen in table 2. We do mean the last 500 years and not the last 5000 years.

#### Comment 27

Lines 281-282: there is a lot of uncertainty around the timing and the magnitude of the oceanic forcing, but we know (1) from evidence inferred from sediment cores, that this might have increased already several thousand of years before the Holocene Thermal Maximum (e.g. Jennings et al., 2017, Lloyd et al., 2023 ...) and (2) from paleo model simulations (e.g. Trace-21ka experiments using the NCAR-POP model), that this hasn't been uniform around Greenland during the last deglaciation. For example, warmer oceanic waters have been suggested to occur in the east/northeast of Greenlandic coasts already at the early Holocene (e.g. Lloyd et al., 2023, Werner et al., 2016, ...). In this work, the ocean thermal forcing is scaled depending on the latitude ( $<71^{\circ}\text{N}$ , between and  $>80^{\circ}\text{N}$ ), but this is a crude simplification. Given the importance of such a forcing in your simulations, I believe you should discuss in more detail the limitations of using a quasi-uniform oceanic forcing and the unrealistic activation of this forcing only in the last 5000 years. Specifically, describe how these factors might affect your results.

**Response:** Thank you for the comment.

Yes there is a lot of uncertainty in the oceanic forcing which is also the reason we wanted to use our rather simplified approach. The spatial dependence was taken from Aschwanden et al. (2019), while the temporal dependence was inspired by the sudden onset seen by Clark et al. (2020). Introducing a non uniform scaling to for example allow different onsets between west and east of Greenland would be interesting.

In the revised version of the paper we will include a more detailed discussion on the limitations of scaling the ocean forcing uniformly and how this affects our results.

### Comment 28

Line 283: “the estimated mass loss rate shifts from a prior of  $-12\pm 40$  mm ka<sup>-1</sup> to a posterior of  $-23\pm 26$  mm ka<sup>-1</sup>”: I don’t see the  $-12\pm 40$  mm ka<sup>-1</sup> in Table 2. Where does this estimate come from?

**Response:** Thank you for the comment.

These estimates are not shown in table 2 but are found when excluding the simulations that utilize the temperature reconstruction from Gkinis et al. (2014), where the temperature anomaly has a peak of 4.5 K during the last 500 years.

In the revised version of the paper we will include a figure showing how temperature outliers affect our mass loss estimates.

### Comment 29

Lines 310-312: so, do you think that the assumption made by Lecavalier et al., 2017 was wrong? And if yes, could you explain better why? I think that this whole section (6.3) should be better discussed. Please follow Jessica Badgeley’ comments on the uncertainty in deriving elevation changes from ice cores. I think this is a central point of your discussion: how much can we trust elevation histories only to validate model simulations if we can’t quantify their uncertainties?

**Response:** Thank you for the comment.

We do not think that the assumption by Lecavalier et al. (2017) is necessarily wrong. We choose to use the surface elevation histories by Vinther et al. (2009) because these estimates are backed up by independent measurements of total gas content at CC where the surface elevation histories derived by Vinther et al. (2009) and Lecavalier et al. (2017) deviate the most.

In the revised version of the paper we will rewrite section 6.3 to include these considerations.

### Comment 30

Line 355-358: I agree that an ice-sheet model coupled to an atmospheric one would help to investigate the response of the ice sheet to non-local climatic effects, but there are cheaper solutions that could already improve the representation of the non-uniform temperature and precipitation patterns across Greenland, e.g. the usage of a spatial variable paleo climatology (i.e. Buizert et al., 2018, Badgeley et al., 2020). See my general comments.

**Response:** Thank you for the comment.

Yes the spatially variable products of Buizert et al. (2018) and Badgeley et al. (2020) would be cheaper to implement. However, these products are based on the TraCE-21Ka climate simulations which uses the ICE-5G reconstruction for surface topography. The ICE-5G reconstruction differs from our modeled topography which is why a coupling would be interesting although computationally much more expensive.

In the revised version of the paper we will include a discussion on the use of non-uniform temperature anomalies.

### Comment 31

Lines 366-367: I believe that “further investigations” are actually needed since paleoclimate has a primary control on the evolution of the GrIS, and potentially on the surface elevation history. See point above.

**Response:** Thank you for the comment.

We agree that as a next step it would be interesting to use a non-uniform temperature reconstruction although we believe that keeping the Holocene reconstruction of the Greenland Ice Sheet independent of any previous reconstruction would be best to avoid circular conclusions.

In the revised version of the paper we will include a discussion on the use of non-uniform temperature anomalies.

### Comment 32

Lines 421-427: I find this paragraph really interesting, but it should be better explored in the discussion, not only in the conclusion. For example I wasn't able to see a proper discussion on the deviation of your modeled uplift rates at the present with respect to the observed ones, besides one sentence in Section 5.4. Again, I think that the delay in the modeled retreat is a central part of the discussion and should be better addressed.

**Response:** Thank you for the comment.

We agree that this is an important for the discussion. Section 6.2 does already include a discussion on the discrepancies between the modeled and observed present-day bedrock uplift rates.
